# Supplementary material for: A silicon particle-based courier promotes melatonin-mediated seed tolerance to nickel toxicity in rice
Source: Royal Society of Chemistry journal article supplement (doi:10.1039/d2en00187j), 2022-01-01
Supplement: d2en00187j1.pdf [file d2en00187j1.pdf]

**Table S1 Primers used in this study**

| <b>Name</b> | <b>Forward Primer Sequence (5'→3')</b> | <b>Reverse Primer Sequence (5'→3')</b> |
|-------------|----------------------------------------|----------------------------------------|
| UBQ5        | CCGACTACAACATCCAGAAGGAG                | AACAGGAGCCTACGCCTAAGC                  |
| NCED1       | AGCACCAATGATACAAACCAAC                 | TGTGTGCACTTATACTACGTGT                 |
| GA2ox1      | AATACCACCACTCACTCTTAGC                 | CATGCATACTTTGACACGTAGG                 |
| TDC         | CCATTGCCGGCCAGGATGGC                   | GCAGTGCCCTTTGCATAGT                    |
