# Supplementary material for: A silicon particle-based courier promotes melatonin-mediated seed tolerance to nickel toxicity in rice
Source: Royal Society of Chemistry journal article supplement (doi:10.1039/d2en00187j), 2022-01-01
Supplement: d2en00187j2.pdf [file d2en00187j2.pdf]

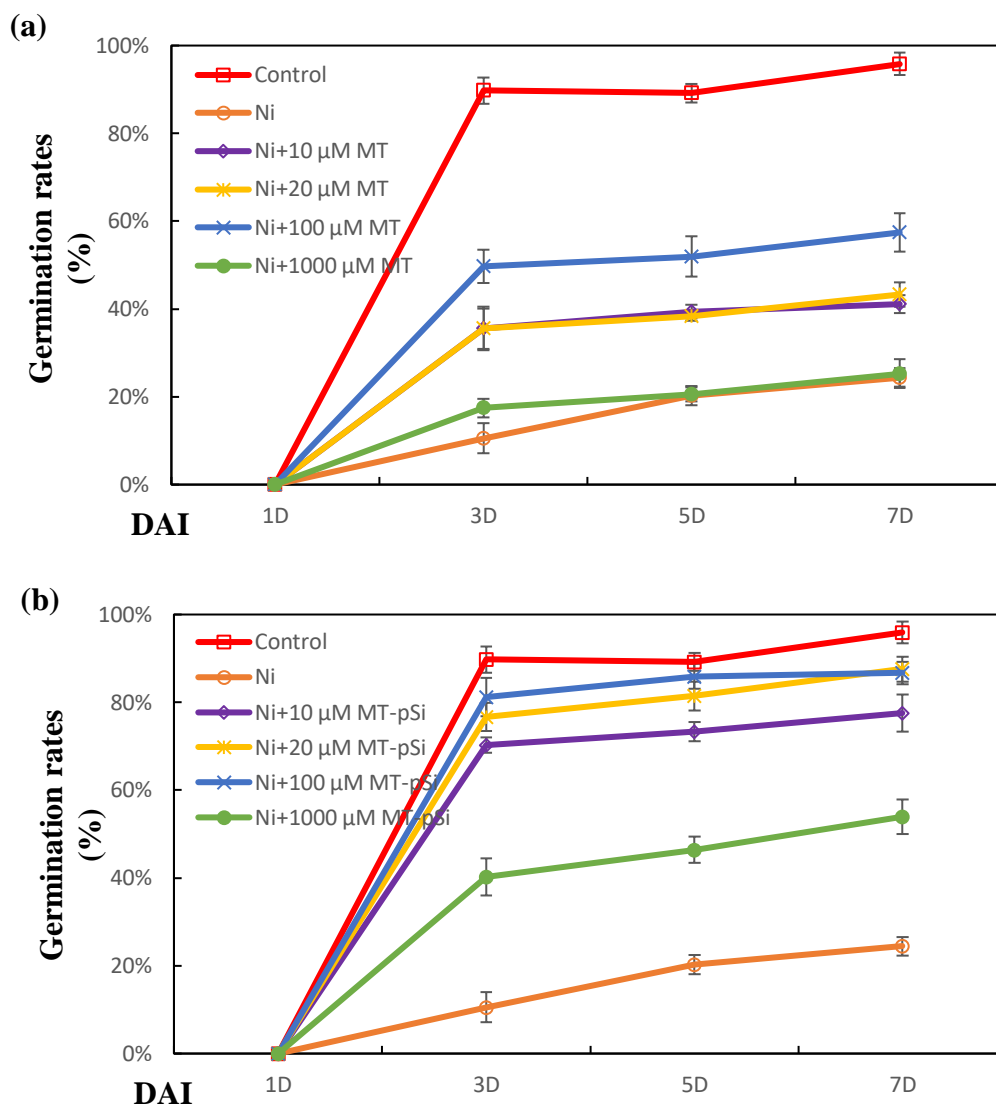

**Figure S1** Detection of the optimal concentrations for porous silicon (pSi)-melatonin (MT) treatments on germination performance under nickel stress. (a) Effects of different concentrations of MT on the germination rates under Ni stress. (b) Effects of different concentrations of MT combined with pSi on the germination rates under Ni stress.

Figure S2

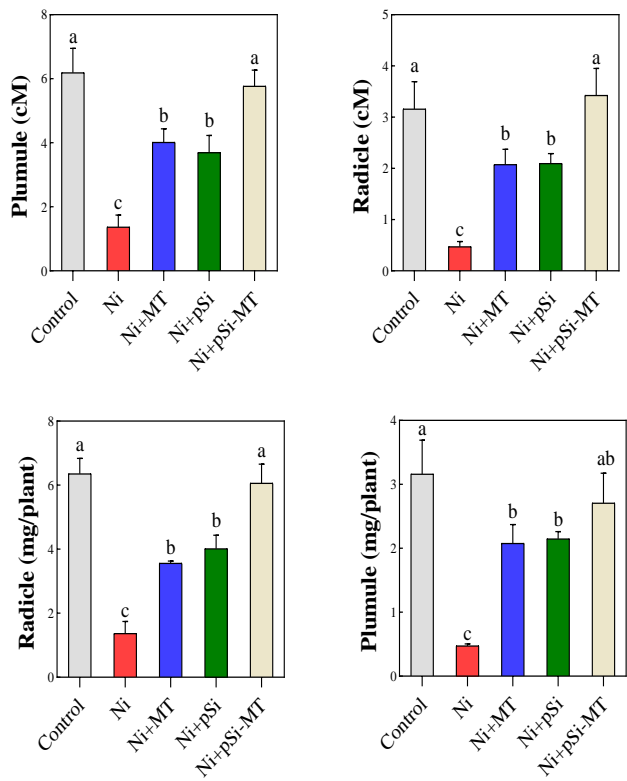

**Figure S2** Effects of nanocomposites of porous silicon (pSi)-melatonin (MT) treatments on germination performance under nickel stress. Radicle and plumule length, dry weights of radicles and plumules, were examined at 7 days after imbibition (DAI) under Ni stress.
